# Supplementary material for: Effect of Natural Variation and Rootstock on Fruit Quality and Volatile Organic Compounds of ‘Kiyomi tangor’ (Citrus reticulata Blanco) Citrus
Source: MDPI journal article supplement (doi:10.3390/ijms242316810), 2023-11-27
Supplement: s1 [file s1]

Table S1 Identification and quantification of the VOCs in the pulp of different treatments

| Retention time<br>(minutes) | Compound names                                       | CAS number  | Formula | RI   | WT/Cj (µg/g FW) |       |       | MT/Cj (µg/g FW) |       |       | MT/Pt (µg/g FW) |      |      |
|-----------------------------|------------------------------------------------------|-------------|---------|------|-----------------|-------|-------|-----------------|-------|-------|-----------------|------|------|
| 5.601                       | Hexanal                                              | 000066-25-1 | C6H12O  | 920  | 5.08            | 5.41  | 5.24  | 3.41            | 3.56  | 3.25  | 3.95            | 3.36 | 3.66 |
| 7.424                       | 2-Hexenal, (E)-                                      | 006728-26-3 | C6H10O  | 1078 | 0.79            | 0.60  | 0.62  | 0.00            | 0.00  | 0.00  | 0.40            | 0.37 | 0.44 |
| 8.805                       | 4-methyl-1-pentanol                                  | 000626-89-1 | C6H14O  | 1197 | 0.00            | 0.00  | 0.00  | 2.75            | 2.41  | 2.55  | 0.00            | 0.00 | 0.00 |
| 10.414                      | Hexanoic acid, methyl ester                          | 000106-70-7 | C7H14O2 | 1029 | 1.05            | 1.02  | 0.99  | 0.51            | 0.45  | 0.45  | 0.73            | 0.61 | 0.84 |
| 10.58                       | α-Pinene                                             | 000080-56-8 | C10H16  | 949  | 1.09            | 1.37  | 1.02  | 0.58            | 0.56  | 0.59  | 0.00            | 0.00 | 0.00 |
| 12.495                      | Bicyclo[3.1.0]hexane, 4-methylene-1-(1-methylethyl)- | 003387-41-5 | C10H16  | 979  | 0.63            | 0.76  | 0.60  | 0.55            | 0.55  | 0.56  | 0.00            | 0.00 | 0.00 |
| 13.474                      | β-Myrcene                                            | 000123-35-3 | C10H16  | 994  | 7.30            | 6.50  | 5.32  | 3.04            | 3.02  | 3.07  | 0.61            | 0.69 | 0.77 |
| 14.094                      | Octanal                                              | 000124-13-0 | C8H16O  | 1033 | 4.78            | 3.63  | 2.48  | 0.00            | 0.00  | 0.00  | 6.99            | 7.04 | 7.09 |
| 14.709                      | 1,3-Cyclohexadiene, 1-methyl-4-(1-methylethyl)-      | 000099-86-5 | C10H16  | 1013 | 0.21            | 0.23  | 0.20  | 0.00            | 0.00  | 0.00  | 0.00            | 0.00 | 0.00 |
| 15.447                      | D-Limonene                                           | 005989-27-5 | C10H16  | 1024 | 503.7           | 526.6 | 440.2 | 235.7           | 238.8 | 239.3 | 57.2            | 49.1 | 65.4 |
|                             |                                                      |             |         |      | 3               | 9     | 5     | 1               | 2     | 0     | 7               | 2    | 1    |
| 17.293                      | γ-Terpinene                                          | 000099-85-4 | C10H16  | 1052 | 0.32            | 0.33  | 0.31  | 0.00            | 0.00  | 0.00  | 0.00            | 0.00 | 0.00 |
| 18.411                      | 1-Octanol                                            | 000111-87-5 | C8H18O  | 1148 | 0.94            | 0.95  | 0.92  | 0.00            | 0.00  | 0.00  | 0.00            | 0.00 | 0.00 |
| 20.705                      | Nonanal                                              | 000124-19-6 | C9H18O  | 1141 | 1.94            | 1.55  | 1.16  | 0.00            | 0.00  | 0.00  | 0.00            | 0.00 | 0.00 |
| 22.481                      | Octanoic acid, methyl ester                          | 000111-11-5 | C9H18O2 | 1178 | 0.00            | 0.00  | 0.00  | 0.00            | 0.00  | 0.00  | 1.24            | 1.59 | 1.41 |
| 23.486                      | Camphor                                              | 000076-22-2 | C10H16O | 1147 | 0.75            | 0.63  | 0.61  | 0.65            | 0.61  | 0.81  | 0.00            | 0.00 | 0.00 |
| 26.583                      | Terpinen-4-ol                                        | 000562-74-3 | C10H18O | 1195 | 0.33            | 0.36  | 0.31  | 0.31            | 0.32  | 0.31  | 0.00            | 0.00 | 0.00 |
| 27.899                      | α-Terpineol                                          | 000098-55-5 | C10H18O | 1215 | 3.08            | 2.50  | 2.17  | 0.49            | 0.43  | 0.47  | 0.75            | 0.80 | 0.84 |
| 29.712                      | Decanal                                              | 000112-31-2 | C10H20O | 1243 | 0.77            | 0.97  | 0.56  | 0.00            | 0.00  | 0.00  | 0.30            | 0.35 | 0.25 |

|        |             |             |         |      |      |      |      |      |      |      |      |      |      |
|--------|-------------|-------------|---------|------|------|------|------|------|------|------|------|------|------|
| 33.178 | (-)-Carvone | 006485-40-1 | C10H14O | 1296 | 0.20 | 0.17 | 0.23 | 0.00 | 0.00 | 0.00 | 0.00 | 0.00 | 0.00 |
| 47.347 | 3-Carene    | 013466-78-9 | C14H24O | 1364 | 0.99 | 0.74 | 0.86 | 0.78 | 0.75 | 0.80 | 0.00 | 0.00 | 0.00 |
|        |             |             | 2       |      |      |      |      |      |      |      |      |      |      |
| 60.831 | Valencen    | 004630-07-3 | C15H24  | 1477 | 5.05 | 5.67 | 4.42 | 3.39 | 3.45 | 3.51 | 0.00 | 0.00 | 0.00 |

---
