# Supplementary material for: Effect of Natural Variation and Rootstock on Fruit Quality and Volatile Organic Compounds of ‘Kiyomi tangor’ (Citrus reticulata Blanco) Citrus
Source: MDPI journal article supplement (doi:10.3390/ijms242316810), 2023-11-27
Supplement: s1 [file s1]

Table S2 Identification and quantification of the VOCs in the peel of different treatments

| Retention time<br>(minutes) | Compound names                                       | CAS number  | Formula | RI       | WT/Cj (µg/g FW) |              |              | MT/Cj (µg/g FW) |              |              | MT/Pt (µg/g FW) |               |               |
|-----------------------------|------------------------------------------------------|-------------|---------|----------|-----------------|--------------|--------------|-----------------|--------------|--------------|-----------------|---------------|---------------|
| 5.547                       | Hexanal                                              | 000066-25-1 | C6H12O  | 915      | 716.53          | 784.50       | 648.56       | 777.01          | 788.72       | 765.29       | 611.43          | 656.98        | 565.87        |
| 7.328                       | 2-Hexenal, (E)-                                      | 006728-26-3 | C6H10O  | 106<br>9 | 619.45          | 582.56       | 563.54       | 673.71          | 666.28       | 681.14       | 906.40          | 939.10        | 873.70        |
| 9.767                       | 2,4-Hexadienal, (E,E)-                               | 000142-83-6 | C6H8O   | 128<br>0 | 21.94           | 20.03        | 18.12        | 0.00            | 0.00         | 0.00         | 0.00            | 0.00          | 0.00          |
| 10.388                      | Bicyclo[3.1.0]hex-2-ene, 4-methyl-1-(1-methylethyl)- | 028634-89-1 | C10H16  | 946      | 0.00            | 0.00         | 0.00         | 16.36           | 17.57        | 18.77        | 19.16           | 18.36         | 17.56         |
| 10.629                      | (1S)-2,6,6-Trimethylbicyclo[3.1.1]hept-2-ene         | 007785-26-4 | C10H16  | 950      | 225.06          | 203.06       | 247.06       | 539.31          | 574.11       | 608.91       | 408.01          | 413.40        | 418.79        |
| 12.549                      | Bicyclo[3.1.0]hexane, 4-methylene-1-(1-methylethyl)- | 003387-41-5 | C10H16  | 979      | 152.60          | 172.54       | 192.47       | 661.54          | 708.02       | 754.50       | 490.91          | 534.22        | 577.53        |
| 13.586                      | β-Myrcene                                            | 000123-35-3 | C10H16  | 995      | 1774.7<br>6     | 1878.4<br>3  | 1671.0<br>8  | 3023.3<br>0     | 3183.3<br>2  | 3343.3<br>4  | 2100.43         | 2298.73       | 2497.03       |
| 14.223                      | Octanal                                              | 000124-13-0 | C8H16O  | 103<br>7 | 663.05          | 652.51       | 641.98       | 358.13          | 375.24       | 392.35       | 818.18          | 833.95        | 849.73        |
| 14.843                      | 1,3-Cyclohexadiene, 1-methyl-4-(1-methylethyl)-      | 000099-86-5 | C10H16  | 101<br>5 | 0.00            | 0.00         | 0.00         | 34.05           | 37.74        | 41.43        | 38.53           | 39.68         | 40.83         |
| 16.159                      | D-Limonene                                           | 005989-27-5 | C10H16  | 103<br>5 | 71850.<br>59    | 70018.<br>95 | 68187.<br>30 | 94580.<br>46    | 88527.<br>31 | 82474.<br>16 | 112482.<br>80   | 118701.<br>42 | 106264.<br>17 |
| 16.924                      | β-Ocimene                                            | 013877-91-3 | C10H16  | 104<br>7 | 25.81           | 25.09        | 26.52        | 290.52          | 311.67       | 332.82       | 124.55          | 148.71        | 145.01        |
| 17.459                      | γ-Terpinene                                          | 000099-85-4 | C10H16  | 105      | 12.37           | 12.30        | 12.44        | 28.14           | 31.32        | 34.50        | 31.69           | 34.75         | 33.73         |

|        |                                                          |             |             |          |        |        |        |        |        |        |        |        |        |
|--------|----------------------------------------------------------|-------------|-------------|----------|--------|--------|--------|--------|--------|--------|--------|--------|--------|
|        |                                                          |             |             | 5        |        |        |        |        |        |        |        |        |        |
| 17.956 | cis-Thujane-4-ol                                         | 015537-55-0 | C10H18<br>O | 106<br>2 | 12.85  | 11.74  | 12.30  | 0.00   | 0.00   | 0.00   | 10.81  | 12.50  | 9.12   |
| 18.432 | 1-Octanol                                                | 000111-87-5 | C8H18O      | 114<br>8 | 72.90  | 70.23  | 75.57  | 22.13  | 22.68  | 23.22  | 75.42  | 82.54  | 77.53  |
| 19.374 | Cyclohexene, 1-methyl-4-(1-methylethylidene)-            | 000586-62-9 | C10H16      | 108<br>4 | 28.31  | 27.83  | 28.80  | 66.72  | 70.47  | 74.22  | 59.43  | 63.49  | 67.55  |
| 20.459 | 1,6-Octadien-3-ol, 3,7-dimethyl-                         | 000078-70-6 | C10H18<br>O | 110<br>1 | 425.78 | 417.12 | 434.45 | 533.54 | 552.25 | 570.97 | 911.83 | 930.30 | 893.36 |
| 20.754 | Nonanal                                                  | 000124-19-6 | C9H18O      | 114<br>2 | 99.64  | 91.84  | 107.44 | 89.74  | 93.05  | 96.36  | 911.83 | 265.55 | 250.58 |
| 21.058 | 2,6-Dimethyl-1,3,5,7-octatetraene, E,E-                  | 000460-01-5 | C10H14      | 111<br>0 | 0.00   | 0.00   | 0.00   | 0.00   | 0.00   | 0.00   | 911.83 | 15.06  | 14.96  |
| 21.797 | 2-Cyclohexen-1-ol, 1-methyl-4-(1-methylethenyl)-, trans- | 007212-40-0 | C10H16<br>O | 112<br>1 | 22.11  | 22.97  | 21.25  | 38.78  | 40.48  | 42.17  | 39.53  | 43.35  | 41.52  |
| 22.823 | Limonene oxide, cis-                                     | 013837-75-7 | C10H16<br>O | 113<br>7 | 8.16   | 8.49   | 7.83   | 17.80  | 17.99  | 18.18  | 8.11   | 8.02   | 8.30   |
| 22.984 | 1,3,8-p-Menthatriene                                     | 18368-95-1  | C10H14      | 113<br>9 | 20.64  | 23.03  | 21.83  | 28.90  | 29.84  | 30.77  | 26.76  | 29.20  | 28.25  |
| 23.193 | (+)-(E)-Limonene oxide                                   | 006909-30-4 | C10H16<br>O | 114<br>3 | 95.21  | 90.62  | 92.91  | 105.36 | 110.11 | 114.87 | 91.74  | 114.87 | 112.69 |
| 24.738 | 6-Octenal, 3,7-dimethyl-, (R)-                           | 002385-77-5 | C10H18<br>O | 116<br>6 | 80.52  | 93.50  | 87.01  | 78.38  | 84.35  | 90.32  | 100.27 | 110.48 | 112.11 |
| 26.562 | Terpinen-4-ol                                            | 000562-74-3 | C10H18<br>O | 119<br>4 | 0.00   | 0.00   | 0.00   | 0.00   | 0.00   | 0.00   | 86.34  | 84.56  | 88.12  |
| 27.632 | p-Mentha-1(7),8-dien-2-ol                                | 035907-10-9 | C10H16      | 121      | 0.00   | 0.00   | 0.00   | 0.00   | 0.00   | 0.00   | 42.87  | 43.02  | 42.73  |

|        |                                                        |             |        |     |        |        |        |        |        |        |         |         |         |
|--------|--------------------------------------------------------|-------------|--------|-----|--------|--------|--------|--------|--------|--------|---------|---------|---------|
|        |                                                        |             | O      | 1   |        |        |        |        |        |        |         |         |         |
| 27.926 | $\alpha$ -Terpineol                                    | 000098-55-5 | C10H18 | 121 | 316.93 | 368.68 | 342.81 | 141.77 | 147.75 | 153.73 | 333.67  | 344.58  | 322.76  |
|        |                                                        |             | O      | 5   |        |        |        |        |        |        |         |         |         |
| 28.541 | Cyclohexanone, 2-methyl-5-(1-methylethenyl)-, trans-   | 005948-04-9 | C10H16 | 122 | 0.00   | 0.00   | 0.00   | 0.00   | 0.00   | 0.00   | 45.20   | 38.10   | 52.31   |
|        |                                                        |             | O      | 5   |        |        |        |        |        |        |         |         |         |
| 29.793 | Decanal                                                | 000112-31-2 | C10H20 | 124 | 490.23 | 420.30 | 455.27 | 344.69 | 347.79 | 350.90 | 1409.30 | 1562.21 | 1256.39 |
|        |                                                        |             | O      | 4   |        |        |        |        |        |        |         |         |         |
| 30.595 | Acetic acid, octyl ester                               | 000112-14-1 | C10H20 | 125 | 0.00   | 0.00   | 0.00   | 50.36  | 52.46  | 54.55  | 130.90  | 153.76  | 108.04  |
|        |                                                        |             | O2     | 6   |        |        |        |        |        |        |         |         |         |
| 30.755 | 2-Cyclohexen-1-ol, 2-methyl-5-(1-methylethenyl)-, cis- | 001197-06-4 | C10H16 | 125 | 116.15 | 116.91 | 142.13 | 70.75  | 74.12  | 77.50  | 83.69   | 80.20   | 87.19   |
|        |                                                        |             | O      | 9   |        |        |        |        |        |        |         |         |         |
| 31.092 | Santolina triene                                       | 002153-66-4 | C10H16 | 126 | 0.00   | 0.00   | 0.00   | 34.51  | 37.64  | 40.78  | 0.00    | 0.00    | 0.00    |
|        |                                                        |             |        | 4   |        |        |        |        |        |        |         |         |         |
| 32.168 | Citronellol                                            | 000106-22-9 | C10H20 | 128 | 51.97  | 54.75  | 57.53  | 53.17  | 55.29  | 57.41  | 142.05  | 151.99  | 161.93  |
|        |                                                        |             | O      | 0   |        |        |        |        |        |        |         |         |         |
| 32.151 | (-)-Carvone                                            | 000106-22-9 | C10H20 | 128 | 0.00   | 0.00   | 0.00   | 259.41 | 275.02 | 290.63 | 44.60   | 43.01   | 46.19   |
|        |                                                        |             | O      | 0   |        |        |        |        |        |        |         |         |         |
| 33.098 | D-Carvone                                              | 002244-16-8 | C10H14 | 129 | 0.00   | 0.00   | 0.00   | 0.00   | 0.00   | 0.00   | 288.80  | 269.17  | 278.99  |
|        |                                                        |             | O      | 5   |        |        |        |        |        |        |         |         |         |
| 34.885 | 2,6-Octadien-1-ol, 3,7-dimethyl-, (Z)-                 | 000106-25-2 | C10H18 | 132 | 18.82  | 19.41  | 21.97  | 0.00   | 0.00   | 0.00   | 0.00    | 0.00    | 0.00    |
|        |                                                        |             | O      | 2   |        |        |        |        |        |        |         |         |         |
| 35.403 | 2-Dodecenal, (E)-                                      | 020407-84-5 | C12H22 | 125 | 59.25  | 62.50  | 65.75  | 0.00   | 0.00   | 0.00   | 67.47   | 69.33   | 75.87   |
|        |                                                        |             | O      | 7   |        |        |        |        |        |        |         |         |         |
| 36.142 | 1-Cyclohexene-1-carboxaldehyde, 4-(1-methylethenyl)-   | 002111-75-3 | C10H14 | 134 | 230.77 | 225.95 | 221.14 | 148.20 | 157.91 | 167.61 | 418.13  | 393.47  | 405.80  |
|        |                                                        |             | O      | 1   |        |        |        |        |        |        |         |         |         |
| 36.404 | Citral                                                 | 005392-40-5 | C10H16 | 134 | 313.25 | 314.40 | 315.56 | 166.70 | 177.71 | 188.72 | 217.24  | 211.33  | 223.15  |

|        |                                             |             |        |     |        |        |        |        |        |        |         |         |         |
|--------|---------------------------------------------|-------------|--------|-----|--------|--------|--------|--------|--------|--------|---------|---------|---------|
|        |                                             |             | O      | 5   |        |        |        |        |        |        |         |         |         |
| 36.874 | 1-Decanol                                   | 000112-30-1 | C10H22 | 135 | 0.00   | 0.00   | 0.00   | 0.00   | 0.00   | 0.00   | 24.52   | 27.09   | 29.45   |
|        |                                             |             | O      | 2   |        |        |        |        |        |        |         |         |         |
| 38.243 | <i>p</i> -Mentha-1(7),8(10)-dien-9-ol       | 029548-13-8 | C10H16 | 137 | 0.00   | 0.00   | 0.00   | 0.00   | 0.00   | 0.00   | 112.59  | 95.90   | 129.29  |
|        |                                             |             | O      | 3   |        |        |        |        |        |        |         |         |         |
| 38.869 | 3-Cyclohexene-1-ethanol, .beta.,4-dimethyl- | 018479-68-0 | C10H18 | 138 | 12.44  | 12.82  | 13.20  | 148.50 | 157.52 | 166.54 | 20.32   | 24.93   | 22.62   |
|        |                                             |             | O      | 3   |        |        |        |        |        |        |         |         |         |
| 40.543 | Undecanal                                   | 000112-44-7 | C11H22 | 132 | 20.41  | 21.68  | 22.95  | 34.50  | 34.79  | 35.08  | 57.56   | 65.39   | 73.21   |
|        |                                             |             | O      | 7   |        |        |        |        |        |        |         |         |         |
| 43.897 | Z-Carvyl acetate                            | 001205-42-1 | C12H18 | 133 | 9.14   | 8.88   | 9.41   | 76.14  | 79.29  | 82.44  | 43.46   | 45.33   | 41.59   |
|        |                                             |             | O2     | 6   |        |        |        |        |        |        |         |         |         |
| 44.657 | $\alpha$ -Cubebene                          | 017699-14-8 | C15H24 | 132 | 14.64  | 15.62  | 15.13  | 44.23  | 44.71  | 45.19  | 30.32   | 33.70   | 37.08   |
|        |                                             |             |        | 9   |        |        |        |        |        |        |         |         |         |
| 46.047 | 2,6-Octadiene, 2,6-dimethyl-                | 002792-39-4 | C10H18 | 149 | 23.58  | 23.02  | 24.14  | 76.91  | 80.07  | 83.23  | 78.85   | 83.77   | 88.70   |
|        |                                             |             |        | 3   |        |        |        |        |        |        |         |         |         |
| 46.694 | Carveol acetate                             | 000097-42-7 | C12H18 | 136 | 0.00   | 0.00   | 0.00   | 0.00   | 0.00   | 0.00   | 36.84   | 37.69   | 36.00   |
|        |                                             |             | O2     | 3   |        |        |        |        |        |        |         |         |         |
| 47.395 | 3-Carene                                    | 013466-78-9 | C10H16 | 151 | 420.71 | 402.23 | 439.19 | 1305.2 | 1217.2 | 1393.1 | 1493.74 | 1626.65 | 1360.82 |
|        |                                             |             |        | 4   |        |        |        | 1      | 8      | 5      |         |         |         |
| 49.246 | $\beta$ cubebene                            | 013744-15-5 | C15H24 | 137 | 40.00  | 40.93  | 39.06  | 123.97 | 123.28 | 124.66 | 62.54   | 71.52   | 80.51   |
|        |                                             |             |        | 1   |        |        |        |        |        |        |         |         |         |
| 49.577 | (-)-b-Elemene                               | 000515-13-9 | C15H24 | 137 | 149.81 | 143.98 | 155.64 | 1259.7 | 1275.9 | 1243.4 | 548.59  | 583.04  | 617.49  |
|        |                                             |             |        | 4   |        |        |        | 1      | 9      | 4      |         |         |         |
| 51.583 | (-)-Zingiberene; l-Zingiberene              | 000495-60-3 | C15H24 | 139 | 0.00   | 0.00   | 0.00   | 0.00   | 0.00   | 0.00   | 13.65   | 15.89   | 18.12   |
|        |                                             |             |        | 3   |        |        |        |        |        |        |         |         |         |
| 52.145 | Caryophyllene                               | 000087-44-5 | C15H24 | 139 | 0.00   | 0.00   | 0.00   | 0.00   | 0.00   | 0.00   | 447.04  | 488.56  | 405.52  |



|        |                                        |              |              |          |             |        |             |             |             |             |         |         |         |
|--------|----------------------------------------|--------------|--------------|----------|-------------|--------|-------------|-------------|-------------|-------------|---------|---------|---------|
|        |                                        |              |              | 8        |             |        |             |             |             |             |         |         |         |
| 52.289 | <i>p</i> -Mentha-1,8-dien-7-yl acetate | 015111-96-3  | C12H18<br>O2 | 141<br>5 | 0.00        | 0.00   | 0.00        | 0.00        | 0.00        | 0.00        | 523.31  | 523.27  | 523.23  |
| 52.877 | Acetic acid, decyl ester               | 000112-17-4  | C12H24<br>O2 | 142<br>0 | 8.77        | 8.53   | 9.02        | 253.79      | 252.51      | 255.06      | 34.88   | 39.32   | 43.77   |
| 56.001 | Humulene                               | 006753-98-6  | C15H24       | 143<br>3 | 40.28       | 39.16  | 41.40       | 170.91      | 171.61      | 170.22      | 103.22  | 109.29  | 115.36  |
| 57.317 | cis- $\beta$ -Farnesene                | 028973-97-9  | C15H24       | 144<br>5 | 0.00        | 0.00   | 0.00        | 0.00        | 0.00        | 0.00        | 21.37   | 25.67   | 29.97   |
| 57.894 | (E)- $\beta$ -Farnesene                | 018794-84-8  | C15H24       | 145<br>0 | 52.71       | 55.13  | 50.28       | 279.58      | 253.91      | 305.24      | 435.69  | 519.64  | 603.58  |
| 58.568 | Eremophila-1(10),11-diene(8Cl)         | 010219-75-7  | C15H24       | 145<br>6 | 14.80       | 13.46  | 14.13       | 30.24       | 30.94       | 29.54       | 25.27   | 27.48   | 29.70   |
| 59.381 | $\beta$ -copaene                       | 1000374-18-9 | C15H24       | 146<br>4 | 21.19       | 22.15  | 20.24       | 61.36       | 64.63       | 58.09       | 33.89   | 37.22   | 40.55   |
| 59.713 | Eudesma-4(14),7(11)-diene              | 000515-17-3  | C15H24       | 146<br>7 | 66.48       | 62.07  | 70.88       | 140.76      | 144.72      | 136.80      | 111.79  | 123.64  | 135.48  |
| 60.51  | $\beta$ -Guaiene                       | 000088-84-6  | C15H24       | 147<br>4 | 26.91       | 26.78  | 27.03       | 45.15       | 45.31       | 44.99       | 46.13   | 46.71   | 47.29   |
| 61.039 | Valencen                               | 004630-07-3  | C15H24       | 147<br>9 | 1023.1<br>7 | 957.58 | 1088.7<br>5 | 2550.9<br>9 | 2648.6<br>9 | 2453.2<br>9 | 1890.13 | 2094.74 | 2299.34 |
| 61.216 | Bicyclogermacrene                      | 067650-90-2  | C15H24       | 148<br>1 | 0.00        | 0.00   | 0.00        | 42.10       | 43.27       | 40.93       | 0.00    | 0.00    | 0.00    |
| 62.061 | Alloaromadendrene                      | 025246-27-9  | C15H24       | 148<br>8 | 20.95       | 20.23  | 21.67       | 44.83       | 46.95       | 42.71       | 38.92   | 43.45   | 47.98   |
| 62.462 | $\alpha$ -Bulnesene                    | 003691-11-0  | C15H25       | 149      | 0.00        | 0.00   | 0.00        | 0.00        | 0.00        | 0.00        | 19.53   | 27.83   | 23.68   |

|        |                                             |             |             |          |       |       |       |        |        |        |        |        |        |
|--------|---------------------------------------------|-------------|-------------|----------|-------|-------|-------|--------|--------|--------|--------|--------|--------|
|        |                                             |             |             | 2        |       |       |       |        |        |        |        |        |        |
| 63.436 | (-)- $\alpha$ -Panasinsen                   | 056633-28-4 | C15H24      | 150<br>1 | 67.22 | 60.86 | 73.58 | 113.62 | 116.59 | 110.65 | 116.16 | 122.86 | 129.56 |
| 63.896 | $\alpha$ -Farnesene                         | 000502-61-4 | C15H24      | 150<br>5 | 14.39 | 12.29 | 13.34 | 218.23 | 211.06 | 225.40 | 495.27 | 546.34 | 597.41 |
| 64.767 | Cadina-1(10),4-diene                        | 000483-76-1 | C15H24      | 151<br>3 | 68.37 | 65.22 | 62.07 | 212.28 | 227.71 | 196.84 | 126.47 | 144.05 | 161.63 |
| 65.062 | $\beta$ -Sesquiphellandrene                 | 020307-83-9 | C15H25      | 151<br>6 | 0.00  | 0.00  | 0.00  | 0.00   | 0.00   | 0.00   | 22.58  | 23.96  | 25.34  |
| 67.677 | $\alpha$ -elemol                            | 000639-99-6 | C15H26      | 154<br>0 | 0.00  | 0.00  | 0.00  | 0.00   | 0.00   | 0.00   | 12.80  | 13.67  | 14.54  |
| 70.726 | Caryophyllene oxide                         | 001139-30-6 | C15H27      | 156<br>7 | 0.00  | 0.00  | 0.00  | 0.00   | 0.00   | 0.00   | 38.52  | 39.26  | 40.01  |
| 77.278 | 2,6,9,11-Dodecatetraenal, 2,6,10-trimethyl- | 004955-32-2 | C15H22<br>O | 162<br>7 | 6.13  | 6.60  | 7.07  | 0.00   | 0.00   | 0.00   | 0.00   | 0.00   | 0.00   |
| 79.08  | Nootkatone                                  | 004674-50-4 | C15H22<br>O | 164<br>4 | 5.47  | 5.76  | 6.04  | 24.89  | 25.23  | 24.56  | 12.47  | 11.78  | 11.09  |
